# Supplementary material for: p120-catenin regulates VE-cadherin endocytosis and degradation induced by the Kaposi sarcoma–associated ubiquitin ligase K5
Source: PubMed Central journal article supplement — Mol Biol Cell. 2017 Jan 1;28(1):30–40. doi: 10.1091/mbc.E16-06-0459 (PMC5221628; doi:10.1091/mbc.e16-06-0459), 2017-01-01
Supplement: supp_E16-06-0459v1_CombinedSupMats.pdf [file supp_E16-06-0459v1_CombinedSupMats.pdf]

# Supplemental Materials

*Molecular Biology of the Cell*

Nanes et al.

## Supplemental Figures

**Figure S1.** K5-induced down-regulation of VE-cadherin is rapid and selective. (A) K5-FLAG was expressed in primary dermal microvascular endothelial cells by adenoviral transduction. After 24 hours, cells were harvested, and the lysates analyzed by Western blot. (B) K5-FLAG was expressed in primary human keratinocyte cultures by adenoviral transduction. After 48 hours, cells were harvested, and the lysates analyzed by Western blot.

**Figure S2.** K5-induced down-regulation of VE-cadherin requires ubiquitin ligase activity. (A) K5-FLAG was expressed in primary dermal microvascular endothelial cells by adenoviral transduction. After 6 hours, cells were treated with 50  $\mu$ M MG-132 to disrupt the ubiquitin-proteasome system, or with vehicle as a control. After 24 hours, cells were fixed and processed for immunofluorescence. (B) CHO cell lines stably expressing VE-cadherin were transfected with wild-type K5-GFP or a K5 mutant lacking ligase activity (RING mutant; Means et al., 2007). After 24 hours, cells were fixed and processed for immunofluorescence. Bars: 20  $\mu$ m.

**Figure S3.** K5 targets two membrane-proximal lysine residues on VE-cadherin. K5-FLAG was expressed in CHO cell lines stable expressing wild-type or mutant (K626R K633R) VE-cadherin by adenoviral transduction. After 30 hours, cells were fixed and processed for immunofluorescence.

**Figure S4.** MARCH proteins are expressed in endothelial cells and exogenous expression disrupts endothelial junctions. (A) RT-PCR analysis of MARCH expression in primary dermal microvascular endothelial cells. (B) MARCH2-GFP expression in MEC cells leads to decreased expression of VE-cad (top, red) but not PECAM-1 (middle, red) or TfR (bottom, red). (C) Expression of a MARCH2-GFP mutant lacking ligase activity (RING domain mutant) fails to promote VE-cad downregulation in primary dermal microvascular endothelial cells. (D) MARCH4-GFP expression in primary dermal microvascular endothelial cells leads to decreased expression of VE-cad (top, red) and PECAM-1 (middle, red), but not TfR (bottom, red). Bars: 20  $\mu$ m. Asterisks indicate cells expressing MARCH proteins.

# Figure S1

## A

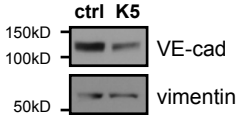

## B

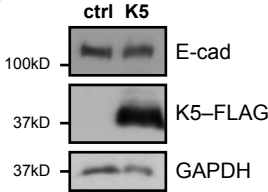

Figure S2

**A**

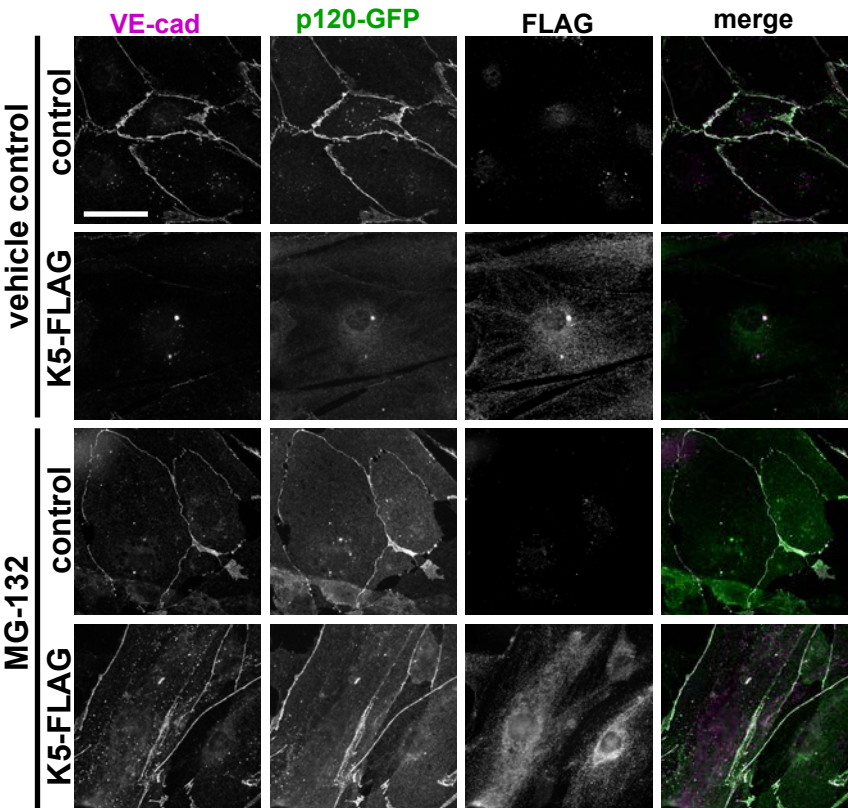

**B**

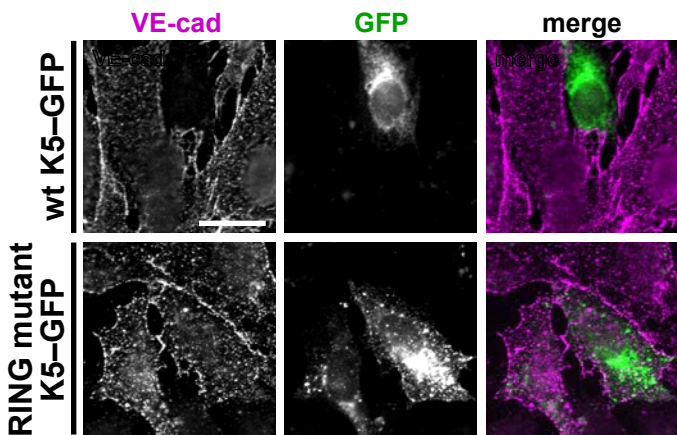

**Figure S3**

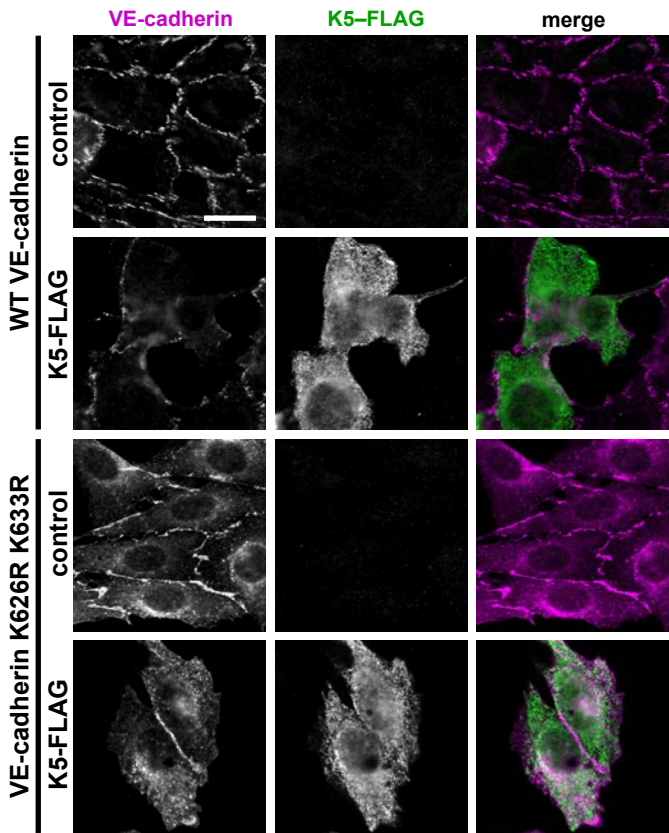

**Figure S4**

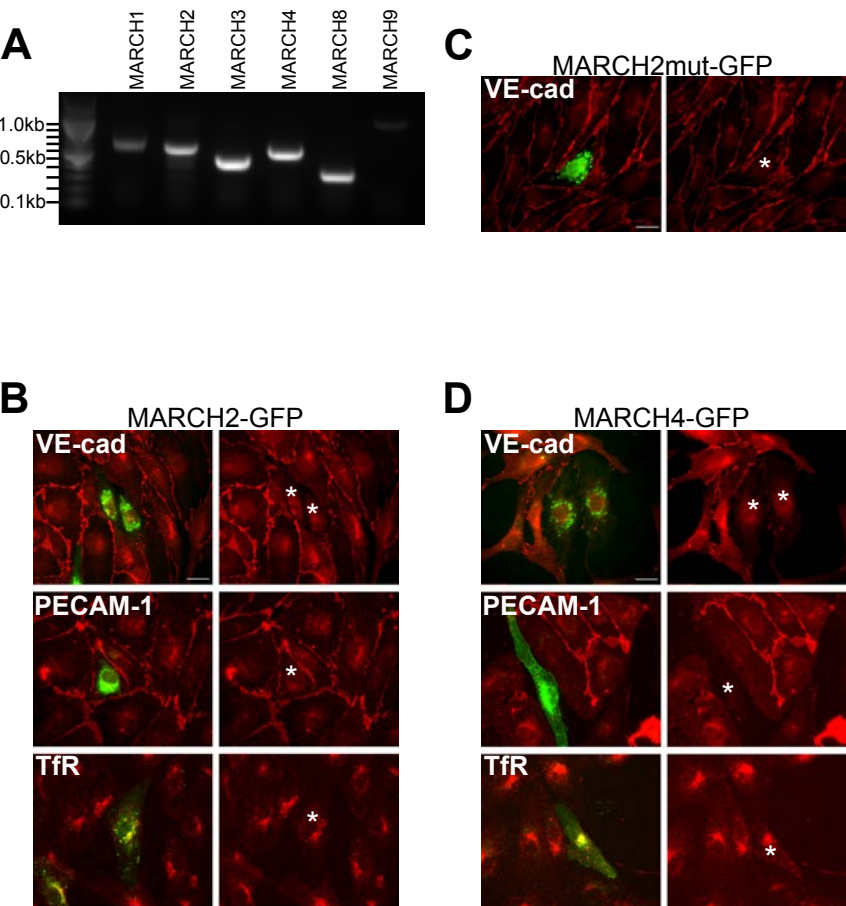

## Supplemental Tables

**Table S1. Primers**

|                                               |                                                                                 |
|-----------------------------------------------|---------------------------------------------------------------------------------|
| VE-cadherin K626R, K633R mutagenesis primers  |                                                                                 |
| forward                                       | 5'-G CGG CTC CGG <u>AGG</u> CAG GCC CGC GCG CAC GGC <u>AGG</u> AGC GTG CCG G-3' |
| reverse                                       | 5'-C CGG CAC GCT <u>CCT</u> GCC GTG CGC GCG GGC CTG <u>CCT</u> CCG GAG CCG C-3' |
| VE-cadherin DEE646–648AAA mutagenesis primers |                                                                                 |
| forward                                       | 5'-CTG GTC ACC TAC <u>GCA GCA GCA</u> GGC GGC GGC GAG ATG-3'                    |
| reverse                                       | 5'-CAT CTC GCC GCC GCC <u>TGC TGC TGC</u> GTA GGT GAC CAG-3'                    |
| VE-cadherin GGG649–651AAA mutagenesis primers |                                                                                 |
| forward                                       | 5'-TAC GAC GAG GAG <u>GCA GCA GCA</u> GAG ATG GAC ACC-3'                        |
| reverse                                       | 5'-GGT GTC CAT CTC <u>TGC TGC TGC</u> CTC CTC GTC GTA-3'                        |

Underlined codons indicate sites of mutation.

**Table S2. Primary antibodies**

| Target           | Antibody                                                                                                                             | Application |
|------------------|--------------------------------------------------------------------------------------------------------------------------------------|-------------|
| β-catenin        | rabbit polyclonal (NeoMarkers, cat. #RB-090-P0)                                                                                      | IF          |
|                  | rabbit polyclonal (Sigma Aldrich, cat. #C-2206)                                                                                      | WB          |
| c-myc            | Rabbit polyclonal (Bethyl Laboratories, cat #A190-105A)                                                                              | WB          |
| E-cadherin       | mouse IgG <sub>2a</sub> (BD Biosciences, cat. #610182)                                                                               | WB          |
| FLAG             | chicken polyclonal (Bethyl Laboratories, cat. #A190-100A)                                                                            | IF, WB      |
| GAPDH            | rabbit polyclonal (Santa Cruz Biotechnology, cat. #sc-25778)                                                                         | WB          |
| GFP              | rabbit polyclonal (Synaptic Systems Cat. #132002)                                                                                    | WB          |
| N-cadherin       | mouse IgG <sub>1</sub> (BD Biosciences, cat. #610920)                                                                                | WB          |
| p120             | rabbit polyclonal (Santa Cruz Biotechnology, cat. #sc-1101)                                                                          | IF, IP, WB  |
|                  | rabbit IgG (Abcam, cat. #ab92514)                                                                                                    | IHC         |
| PECAM            | mouse monoclonal, clone JC70A (DAKO, Cat.# IR61061-2)                                                                                | IF          |
| transferrin rec. | mouse IgG <sub>1</sub> , clone H68.4 (Life Technologies, cat #136800)                                                                | IF          |
| ubiquitin        | mouse IgG <sub>1</sub> (Santa Cruz Biotechnology, cat. #sc-8017)                                                                     | WB          |
| VE-cadherin      | mouse IgG <sub>2A</sub> , clone BV6 (provided by E. Dejana, FIRC Institute of Molecular Oncology, Milan, Italy; Corada et al., 2001) | IF          |
|                  | mouse IgG <sub>1</sub> (BD Biosciences, cat. #610252)                                                                                | IF          |
|                  | rabbit polyclonal (Novus Biologicals, cat. #18940002)                                                                                | IP, WB      |
|                  | goat polyclonal (Santa Cruz Biotechnology, cat. #sc-6458)                                                                            | IHC         |
| vimentin         | mouse IgG (Sigma Aldrich, cat. #V6630)                                                                                               | WB          |

IF, immunofluorescence; WB, Western blot; IP, immunoprecipitation; IHC, immunohistochemistry
